# Supplementary material for: A Reappraisal of the Evolutionary and Developmental Pathway of Apomixis and Its Genetic Control in Angiosperms
Source: PubMed Central journal article supplement (PMC7466056; doi:10.3390/genes11080859), 2020-07-28
Supplement: genes-11-00859-s001.pdf [file genes-11-00859-s001.pdf]

Supplementary Figure

|             | Osativa | Zmays | Atrichopoda | Nthermarum | Ncolorata | Hperforatum | Lsativa | Boleracea | Athaliana | Vvinifera | Ppersica | Mdomestica |
|-------------|---------|-------|-------------|------------|-----------|-------------|---------|-----------|-----------|-----------|----------|------------|
| Osativa     |         |       |             |            |           |             |         |           |           |           |          |            |
| Zmays       | 40.7%   |       |             |            |           |             |         |           |           |           |          |            |
| Atrichopoda | 11.5%   | 12.0% |             |            |           |             |         |           |           |           |          |            |
| Nthermarum  | 14.1%   | 11.8% | 25.3%       |            |           |             |         |           |           |           |          |            |
| Ncolorata   | 14.4%   | 12.3% | 25.0%       | 97.8%      |           |             |         |           |           |           |          |            |
| Hperforatum | 13.0%   | 12.1% | 17.3%       | 18.8%      | 18.8%     |             |         |           |           |           |          |            |
| Lsativa     | 12.4%   | 12.1% | 17.6%       | 18.5%      | 18.5%     | 18.2%       |         |           |           |           |          |            |
| Boleracea   | 12.0%   | 10.7% | 17.9%       | 18.2%      | 17.9%     | 20.9%       | 16.5%   |           |           |           |          |            |
| Athaliana   | 12.7%   | 12.8% | 18.2%       | 19.7%      | 20.3%     | 20.2%       | 17.4%   | 64.0%     |           |           |          |            |
| Vvinifera   | 15.7%   | 13.4% | 21.7%       | 22.9%      | 23.2%     | 21.2%       | 23.6%   | 25.6%     | 25.2%     |           |          |            |
| Ppersica    | 13.1%   | 14.8% | 23.7%       | 22.2%      | 22.7%     | 21.4%       | 22.8%   | 20.3%     | 19.7%     | 30.9%     |          |            |
| Mdomestica  | 11.6%   | 13.6% | 20.9%       | 18.4%      | 18.7%     | 18.0%       | 20.4%   | 17.4%     | 17.0%     | 28.5%     | 56.0%    |            |

**Figure S1.** Pairwise identity percentages between SPL protein from *Arabidopsis thaliana* (AT4G27330) and other 11 SPL-like amino acid sequences retrieved, from *Zea mays* (KY110964.1), *Oryza sativa* (LOC\_Os01g11430.1), *Hypericum perforatum* (OBUPD-D1 Hpctg51499), *Brassica oleracea* (Bol013057), *Malus domestica* (MD11G1234600), *Prunus persica* (Prupe.4G192500.1), *Vitis vinifera* (VIT\_219s0014g03940.1), *Lactuca sativa* (Lsat\_1\_v5\_gn\_0\_5400), *Amborella trichopoda* (XP\_006833114.1), *Nymphaea colorata* (XP031473161.1), *Nymphaea thermarum* (KAF3782288.1)
